# Supplementary material for: Association of Dental and Prosthetic Status with Oral Health-Related Quality of Life in Centenarians
Source: MDPI journal article supplement (doi:10.3390/ijerph182413219), 2021-12-15
Supplement: s1 [file s1]

**Table S1. Bivariate association of centenarians' characteristics and the ADD-GOHAI score (Spearman's rank correlation)**

| Variable                                                    |                                               | ADD-GOHAI score | r <sub>s</sub> | P           |
|-------------------------------------------------------------|-----------------------------------------------|-----------------|----------------|-------------|
|                                                             |                                               | Mean (SD)       |                |             |
| Sex                                                         | Male                                          | 54.25 (3.92)    | 0.02           | 0.45        |
|                                                             | Female                                        | 53.11 (7.23)    |                |             |
| Level of education                                          | Low                                           | 53.26 (6.13)    | 0.06           | 0.36        |
|                                                             | Medium                                        | 53.00 (9.42)    |                |             |
|                                                             | High                                          | 53.73 (5.97)    |                |             |
| Recognized disability*                                      | No                                            | 54.33 (4.56)    | 0.05           | 0.38        |
|                                                             | Yes                                           | 52.36 (8.27)    |                |             |
| Recognized nursing care level*                              | No care level                                 | 56.14 (3.93)    | - 0.08         | 0.31        |
|                                                             | Slight 1                                      | 55.50 (4.95)    |                |             |
|                                                             | 2                                             | 49.45 (10.56)   |                |             |
|                                                             | 3                                             | 53.82 (4.82)    |                |             |
|                                                             | Severe 4                                      | 55.00 (2.83)    |                |             |
| Residence                                                   | Care facility                                 | 52.95 (5.84)    | 0.14           | 0.19        |
|                                                             | At home                                       | 53.63 (7.45)    |                |             |
| S-MMSE                                                      | 11-16 points                                  | 52.30 (7.01)    | 0.18           | 0.13        |
|                                                             | 17-21 points                                  | 54.46 (6.44)    |                |             |
| M(T)                                                        | 0-14                                          | 56.00 (3.96)    | <b>- 0.36</b>  | <b>0.01</b> |
|                                                             | 15-28                                         | 52.81 (7.05)    |                |             |
| Functional capacity according to<br>Nitschke et al.[30, 31] | Resilience level 1 (high functional capacity) | 58.17 (3.13)    | <b>- 0.34</b>  | <b>0.01</b> |
|                                                             | Resilience level 2                            | 53.69 (6.66)    |                |             |
|                                                             | Resilience level 3                            | 51.37 (7.40)    |                |             |
|                                                             | Resilience level 4 (low functional capacity)  | 54.00 (5.24)    |                |             |
| Removable prosthesis                                        | No                                            | 57.60 (3.21)    | <b>- 0.29</b>  | <b>0.03</b> |
|                                                             | Yes                                           | 52.76 (6.88)    |                |             |

\* According to current German legislation [21-23]
